# Supplementary material for: SGC-CLK-1: A chemical probe for the Cdc2-like kinases CLK1, CLK2, and CLK4
Source: PubMed Central journal article supplement — Curr Res Chem Biol. Author manuscript; Available in PMC 2023 Nov 24. (PMC10673624; doi:10.1016/j.crchbi.2023.100045), 2023-09-22

## **SGC-CLK-1: a chemical probe for the Cdc2-Like kinases CLK1, CLK2, and CLK4**

Deanna Tiek<sup>1</sup>, Carrow I. Wells<sup>2</sup>, Martin Schröder<sup>4,5</sup>, Xiao Song<sup>1</sup>, Carla Alamillo-Ferrer<sup>2</sup> Anshika Goenka<sup>1</sup>, Rebeca Iglesia<sup>1</sup>, Minghui Lu<sup>1</sup>, Bo Hu<sup>1</sup>, Frank Kwarciński<sup>3</sup>, Parvathi Sintha<sup>3</sup>, Chandi de Silva<sup>3</sup>, Mohammad Anwar Hossain<sup>2</sup>, Alfredo Picado<sup>2</sup>, William Zuercher<sup>2</sup>, Reena Zutshi<sup>3</sup>, Stefan Knapp<sup>4,5</sup>, Rebecca B. Riggins<sup>6</sup>, Shi-Yuan Cheng<sup>1</sup>, and David H. Drewry<sup>2,7\*</sup>

<sup>1</sup>The Ken & Ruth Davee Department of Neurology, The Lou and Jean Malnati Brain Tumor Institute, The Robert H. Lurie Comprehensive Cancer Center, Simpson Querrey Institute for Epigenetics, Northwestern University Feinberg School of Medicine, Chicago, IL 60611, USA.

<sup>2</sup>Structural Genomics Consortium, UNC Eshelman School of Pharmacy, University of North Carolina at Chapel Hill, Chapel Hill, NC, 27599, USA

<sup>3</sup>Luceome Biotechnologies LLC, Tucson, AZ 85719 USA

<sup>4</sup>Structural Genomics Consortium (SGC), Buchmann Institute for Life Sciences (BMLS), Goethe University Frankfurt am Main, Max-von-Laue-Str. 15, 60438 Frankfurt am Main, Germany

<sup>5</sup>Institut für Pharmazeutische Chemie, Goethe University Frankfurt am Main, Max-von-Laue-Str. 9, Frankfurt am Main 60438, Germany.

<sup>6</sup>Department of Oncology, Lombardi Comprehensive Cancer Center, Georgetown University Medical Center, Washington DC 20057, USA

<sup>7</sup>UNC Lineberger Comprehensive Cancer Center, School of Medicine, University of North Carolina at Chapel Hill, Chapel Hill, NC, 27599, USA

**Material available in this supplemental data document:**

| <b>Item</b>      | <b>Description</b>                                                                                                      | <b>Page Number</b> |
|------------------|-------------------------------------------------------------------------------------------------------------------------|--------------------|
| <b>Table S1</b>  | SGC-CLK-1 Activity Profile                                                                                              | <b>3</b>           |
| <b>Table S2</b>  | SGC-CLK-1N Enzymatic Profile                                                                                            | <b>3</b>           |
| <b>Table S3</b>  | Activity profile of the reported CLK inhibitors and the CLK probe (SGC-CLK-1) mentioned in the crystallography Figure 4 | <b>4</b>           |
| <b>Figure S1</b> | Venn Diagrams of overlap between DepMap and CL100 screen [Related to Fig 5]                                             | <b>5</b>           |
| <b>Figure S2</b> | Changes in phosphorylation with high dose SGC-CLK-1 [Related to Fig 6]                                                  | <b>6</b>           |
| <b>Figure S3</b> | Off-target activity of SGC-CLK-1 and SGC-CLK-1N [Related to Table 2]                                                    | <b>7</b>           |
|                  | SGC-CLK-1 and SGC-CLK-1N synthesis procedures and compound characterization                                             | <b>9</b>           |

**Table S1: SGC-CLK-1 Activity Profile**

| Kinase           | PoC values (percent of control) (at 1 $\mu$ M inhibitor) | Enzyme IC <sub>50</sub> (nM) | NanoBRET (nM) |
|------------------|----------------------------------------------------------|------------------------------|---------------|
| <b>SGC-CLK-1</b> |                                                          |                              |               |
| CLK1             | 8                                                        | 13                           | 165           |
| <b>CLK2</b>      | <b>16</b>                                                | <b>4</b>                     | <b>70</b>     |
| CLK3             | 92                                                       | 363                          | nt**          |
| CLK4             | 13                                                       | 46                           | 100           |
| HIPK1            | 31                                                       | 50                           | >10,000       |
| HIPK2            | 34                                                       | 42                           | >10,000       |
| NEK7             | 40                                                       | nt                           | nt**          |
| PIP5K2B          | 50                                                       | nt                           | nt**          |
| STK16            | 53                                                       | 49                           | 167           |

**Table S2: SGC-CLK-1N Enzymatic Profile**

**Eurofins Enzymatic Screening**

| Kinase | SGC-CLK-1N (CAF-225) IC <sub>50</sub> (nM) |
|--------|--------------------------------------------|
| CLK1   | >10,000                                    |
| CLK2   | >10,000                                    |
| CLK3   | >10,000                                    |
| CLK4   | >10,000                                    |
| DYRK1A | >10,000                                    |
| DYRK1B | >10,000                                    |
| DYRK2  | >10,000                                    |
| DYRK3  | >10,000                                    |
| HIPK1  | >10,000                                    |
| HIPK2  | >10,000                                    |
| HIPK3  | >10,000                                    |
| HIPK4  | >10,000                                    |
| Pim-2  | >10,000                                    |

**Table S3: Activity profile of the reported CLK inhibitors and the CLK probe (SGC-CLK-1)**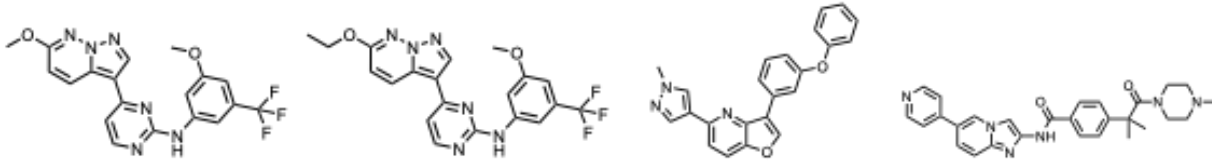

|               | SGC-CLK-1       | CAF-022   | VN412 (12m) | CLK-T3   |
|---------------|-----------------|-----------|-------------|----------|
| CLK1 (Enzyme) | 13 nM           | 10 nM     |             | 0.67 nM  |
| CLK2 (Enzyme) | 4 nM            | 0.73 nM   | 10 nM       | 15 nM    |
| CLK3 (Enzyme) | 363 nM          | no data   |             | 110 nM   |
| CLK4          | 46 nM           | 8.8 nM    |             | no data  |
| CLK1 (NB)     | 154             | 10,000 nM |             | 4 nM     |
| CLK2 (NB)     | 58              | 580 nM    |             | 17 nM    |
| CLK3 (NB)     | NT              | no data   |             | no data  |
| CLK4 (NB)     | 137             | 690 nM    |             | 2 nM     |
| PubMed ID     | This manuscript | 35731869  | 30569600    | 28232751 |

**Table S3:** “Enzyme” data refers to IC50 values generated from an assay that measures the inhibition of phosphorylation of a substrate (generated at Eurofins). “NB” data refers to the NanoBRET in cell target engagement assay as described in the body of the paper. Because it measures binding to the kinase in question in a cell, there can be a substantial drop-off in potency from an enzyme assay to a cellular readout. The differences seen can be compound series and target dependent. Reasons for this vary and can include differential uptake of compound into the cell.

The structure of CAF-052 (compound in pdb code 7ak3) is here:

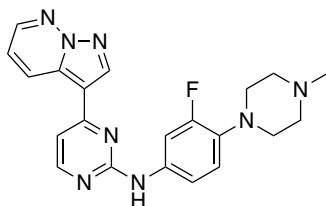

No data is show for CAF-052 in Table S3, as we did not pursue the same detailed CLK family characterization because it is significantly less selective (unpublished data) than the analogs we chose to pursue.

**Figure S1: Venn Diagrams of overlap between DepMap and CL100 screen [Related to Fig 5]**

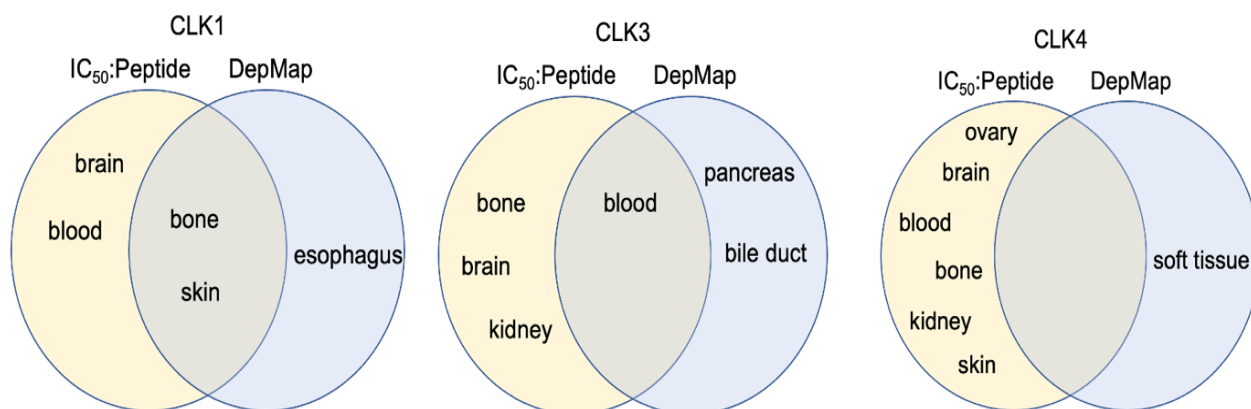

**Supplementary Figure 1. Venn Diagrams of CLK1,3 and 4 overlap between DepMap and CL100 screen.** IC<sub>50</sub>:Peptide and DepMap Venn Diagrams for the other 3 CLK members, where CLK2 has the highest overlap of predicted dependencies.

**Figure S2. Changes in phosphorylation with high dose SGC-CLK-1 [Related to Fig 6]**

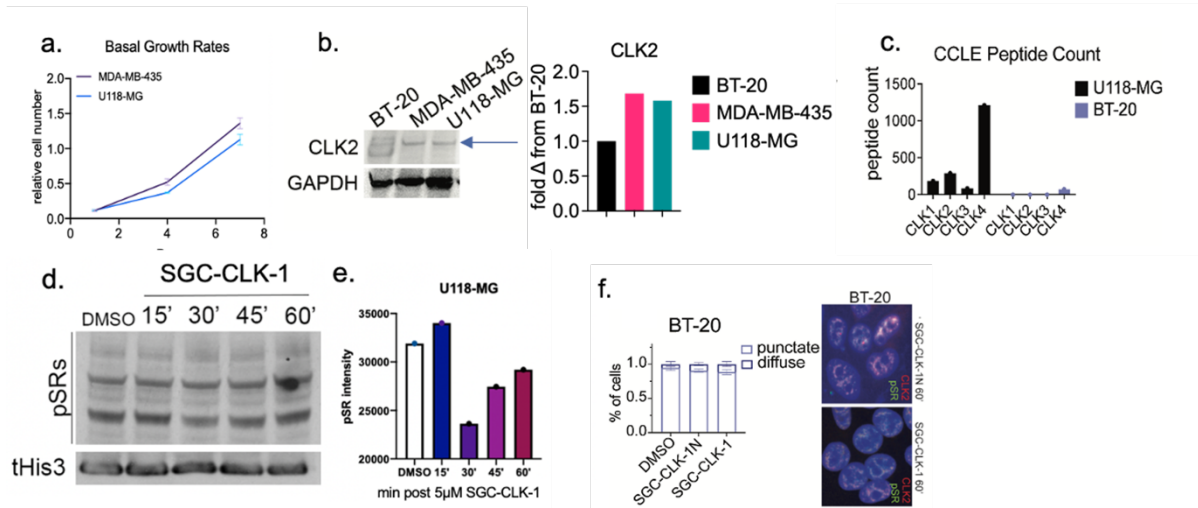

**Supplementary Figure 2. Changes in phosphorylation with high dose SGC-CLK-1.** A. Crystal violet assay to determine basal growth rates of denoted cells at denoted time points. B. Western blot of CLK2 in denoted cell lines and quantification depicted in bar chart. C. CCLE peptide counts for CCLE lines U118-MG and BT-20 (MDA-MB-435 not included). D. Western blot of pSR proteins (1H4) in U118-MG cells post 5 $\mu$ M CAF-170 at denoted times (left), with E. quantification on the right. F. CLK2 distribution with 5  $\mu$ M SGC-CLK-1N (CAF-225), SGC-CLK-1 (CAF-170) or DMSO with representative images on the right.

Figure S3: Off-target activity of SGC-CLK-1 and SGC-CLK-1N [Related to Table 2]

STK16 NB (n=1)

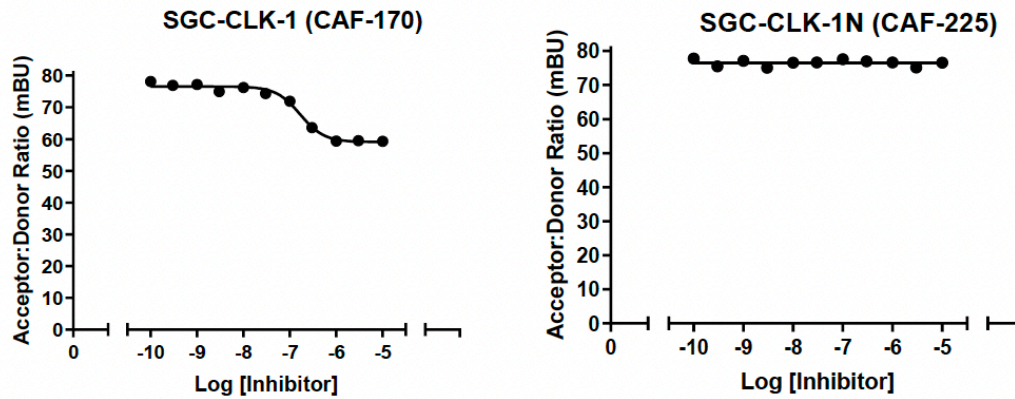

HIPK1

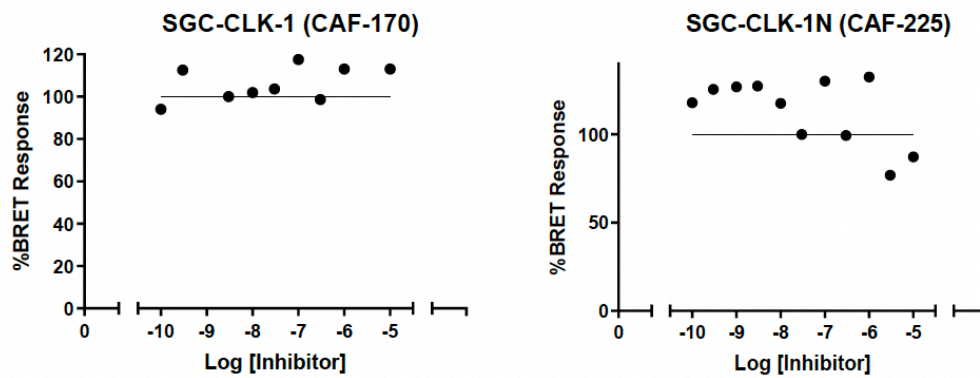

HIPK2

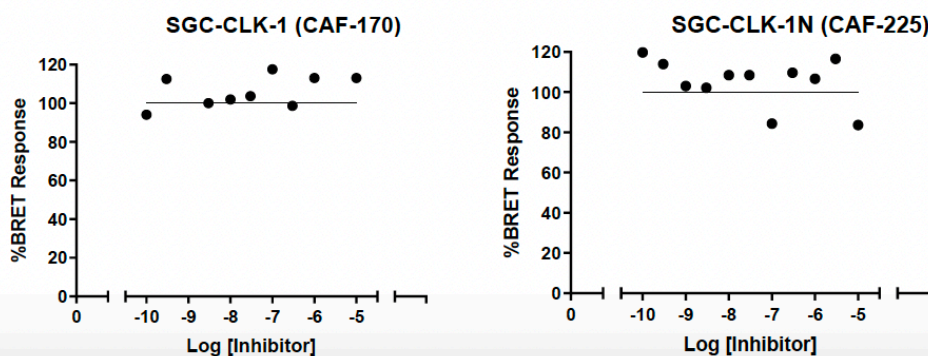

Supplementary Figure S3: Compound characterization in NanoBRET (NB) assays.

NanoBRET in cell target engagement assays were run as recommended and described by Promega. General NB procedures are provided in the body of the paper. For STK16 an IC<sub>50</sub>

value of 167 nM could be generated from the curve, however the highest concentration point did not go to the no tracer control. Thus, we describe this as giving only partial inhibition. The other examples depicted here show that the probe SGC-CLK-1 does not bind to HIPK1 or HIPK2 in this cellular assay at these concentrations. The negative control SGC-CLK-1N does not bind to STK16, HIPK1 or HIPK2 in this cellular assay at these concentrations.



## **SGC-CLK-1 and SGC-CLK-1N synthesis procedures and compound characterization**

### General Chemistry Information

All reagents and solvents, unless specifically stated, were used as obtained from their commercial sources without further purification. Air and moisture sensitive reactions were performed under an inert atmosphere using nitrogen in a previously oven-dried or flame-dried reaction flask, and addition of reagents were done using a syringe. All microwave (MW) reactions were carried out in a Biotage Initiator EXP US 400W microwave synthesizer. Thin layer chromatography (TLC) analyses were performed using 200  $\mu\text{m}$  pre-coated sorbtech fluorescent TLC plates and spots were visualized using UV light. High resolution mass spectrometry samples were analyzed with a ThermoFisher Q Exactive HF-X (ThermoFisher, Bremen, Germany) mass spectrometer coupled with a Waters Acquity H-class liquid chromatograph system. Column chromatography was undertaken with a Biotage Isolera One instrument. Nuclear magnetic resonance (NMR) spectrometry was run on a varian Inova 400 MHz or Bruker Avance III 700 MHz spectrometer equipped with a TCI H-C/N-D 5 mm cryoprobe and data was processed using the MestReNova processor. Chemical shifts are reported in ppm with residual solvent peaks referenced as internal standard.

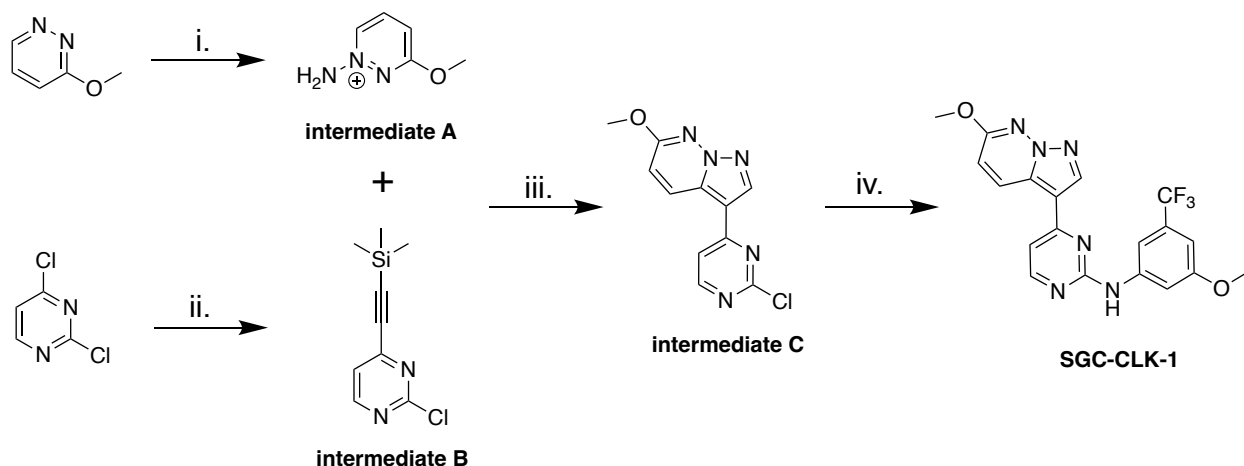

**Reagent and conditions:** i) Amino hydrogen sulphate,  $\text{KHCO}_3$ ,  $\text{H}_2\text{O}$ , 80 C, 14 h; ii)  $\text{KHCO}_3$ ,  $\text{KOH}$ ,  $\text{H}_2\text{O}$ ,  $\text{DCM}$ , r.t, 18 h; iii)  $\text{ETMS}$ ,  $\text{Pd}(\text{dppf})\text{Cl}_2 \cdot \text{CH}_2\text{Cl}_2$ ,  $\text{CuI}$ ,  $\text{PPh}_3$ ,  $\text{TEA}$ ,  $\text{THF}$ , 70 C, 15 min; iv)  $\text{TFA}$ ,  $\text{tert-BuOH}$ , 85 C, 15 h.

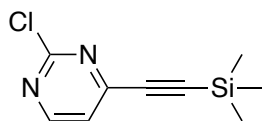

### 2-chloro-4-((trimethylsilyl)ethynyl)pyrimidine (Intermediate B):

2,4-dichloropyrimidine (1.00 g, 6.7 mmol, 1 eq.) and tetrahydrofuran (30 mL) degassed with nitrogen for 10-12 min, then ethynyltrimethylsilane (0.73 g, 7.4 mmol, 1.1 eq.) and triethylamine (0.74 g, 7.5 mmol, 1.1 eq.) added, degassed for another 5min, then the rest of reagents  $\text{PdCl}_2(\text{dppf})\text{-CH}_2\text{Cl}_2$  adduct (0.27 g, 0.34 mmol, 0.05 eq.), copper(I) iodide (0.13 g, 0.67 mmol, 0.10 eq.), triphenylphosphine (0.18 g, 0.67 mmol, 0.10 eq.) were added. Reaction was then refluxed for 15 min. Bulky solid formed. By TLC, all starting material was consumed (Hexanes:EtOAc, 85:15). Hexanes added to precipitated  $\text{OPPh}_3$ , filtered and rinsed with EtOAc. The crude material was concentrated in the rotavap, thick brown liquid formed. Desired product obtained using flash chromatography using EtOAc in hexanes (0% to 20%). Concentrated in rotavapor, dried under vacuum overnight and desired product yielded as brown solid 770 mg (yield 50%), purity >90% by NMR.

$^1\text{H}$  NMR (400 MHz,  $\text{DMSO-}d_6$ )  $\delta$  ppm 0.27 (s, 9 H), 7.66 (d,  $J=5.1$  Hz, 1 H), 8.80 (d,  $J=5.1$  Hz, 1 H).

$^{13}\text{C}$  NMR (101 MHz,  $\text{DMSO-}d_6$ )  $\delta$  ppm 100.4, 102.1, 122.6, 151.4, 160.1, 161.2.

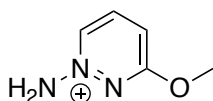

### 1-amino-3-methoxypyridazin-1-ium (Intermediate A):

Amino hydrogen sulphate (0.83 g, 7.39 mmol, 3.7 eq.) was dissolved in water (1.6 mL),  $\text{KHCO}_3$  (0.74 g, 7.39 mmol, 3.7 eq.) in water (1.0 mL), pH 5. Then 3-methoxypyridazine (0.22 g, 2.00 mmol, 1.00 eq.) was added in portion. Reaction was then stirred at 80 °C overnight. This crude is used as is for the next reaction without purification.

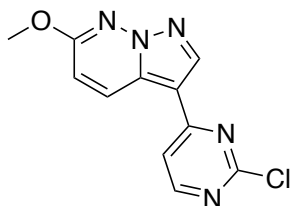

### 3-(2-chloropyrimidin-4-yl)-6-methoxypyrazolo[1,5-b]pyridazine (Intermediate C):

1-amino-3-methoxypyridazin-1-ium (0.20 g, 1.6 mmol, 1.5 eq.) from the previous step (pH = 1) was treated with saturated  $\text{KHCO}_3$  to bring the pH to 7. 2-chloro-4-((trimethylsilyl)ethynyl)pyrimidine (0.22 g, 1.04 mmol, 1.00 eq.) was dissolved in 1 mL of DCM (1 M), added in one portion over the crude. KOH (0.320 g, 6.26 mmol, 6 eq.) was dissolved in  $\text{H}_2\text{O}$  (5 mL) 1.0 M and was added in one portion over previous mixture. The reaction mixture was transformed dark red in color after 5-10 min. Reaction mixture was strongly stirred at r.t. for 22 h. The crude mixture was then quenched with water, extracted with DCM, and combined organic layers dried over anhydrous  $\text{Na}_2\text{SO}_4$ . Crude was dry loaded on a 10 g Biotage Sfar 60  $\mu\text{m}$  silica cartridge (Hexanes/ $\text{EtOAc}$  70:30) and whitish/light pink solid yielded (0.095 g, 35% yield). LCMS  $[\text{M}+1] = 262$ , purity > 95%.

$^1\text{H}$  NMR (400 MHz,  $\text{DMSO}-d_6$ )  $\delta$  ppm 4.02 (s, 3 H), 7.27 (d,  $J=9.4$  Hz, 1 H), 8.01 (d,  $J=5.5$  Hz, 1 H), 8.66 - 8.78 (m, 2 H), 8.83 (s, 1 H).

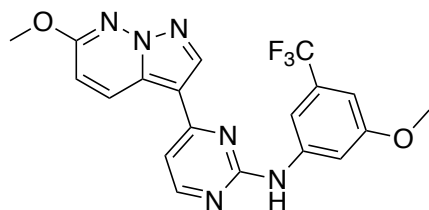

### N-(3-methoxy-5-(trifluoromethyl)phenyl)-4-(6-methoxypyrazolo[1,5-b]pyridazin-3-yl)pyrimidin-2-amine (SGC-CLK-1; CAF-170)

3-(2-chloropyrimidin-4-yl)-6-methoxypyrazolo[1,5-b]pyridazine (0.085 g, 0.32 mmol, 1 eq.), 3-methoxy-5-(trifluoromethyl)aniline (0.075 g, 0.39 mmol, 1.20 eq.), and tert-butanol (4.5 mL) were mixed into a microwave vial, 4 small drops of TFA added, vial sealed, reaction stirred at 85 °C for 15 h. Reaction mixture cooled to r.t., quenched with water and  $\text{NaHCO}_3$ , pH adjusted to 7, solid precipitated, more water added, solid filtrated, thoroughly rinsed with water, air dried. Pale pink solid obtained, 110 mg recovered. The product was purified using Biotage Sfar 10g silica

cartridge, solid load. Hexanes/EtOAc gradient from 0% to 50% EtOAc and pale whitish solid yielded (0.057 g, > 95% pure). LCMS [M+1] = 417, 418.

$^1\text{H}$  NMR (850 MHz, DMSO- $d_6$ )  $\delta$  9.90 (s, 1H), 9.02 (d,  $J$  = 9.6 Hz, 1H), 8.72 (s, 1H), 8.54 (d,  $J$  = 5.2 Hz, 1H), 7.84 (d,  $J$  = 1.8 Hz, 1H), 7.68 (t,  $J$  = 2.2 Hz, 1H), 7.43 (d,  $J$  = 5.2 Hz, 1H), 7.15 (d,  $J$  = 9.5 Hz, 1H), 6.85 (t,  $J$  = 2.0 Hz, 1H), 4.03 (s, 3H), 3.84 (s, 3H).

$^{13}\text{C}$  NMR (214 MHz, DMSO- $d_6$ )  $\delta$  163.22, 162.93, 162.78, 162.58, 161.21, 145.80, 141.40, 133.84, 133.54, 133.39, 132.60, 127.97, 126.70, 116.29, 113.54, 111.55, 111.00, 110.54, 106.06, 58.69, 57.91.

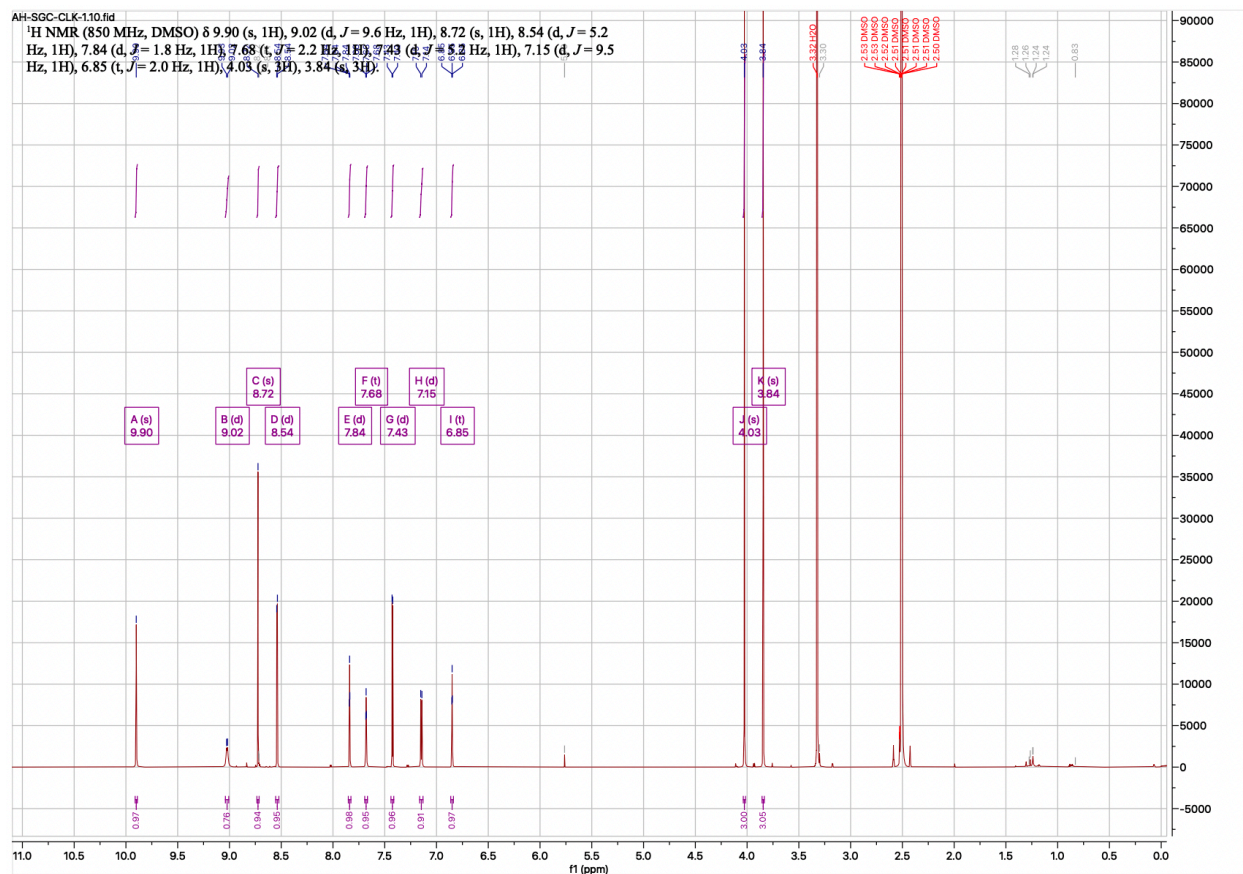

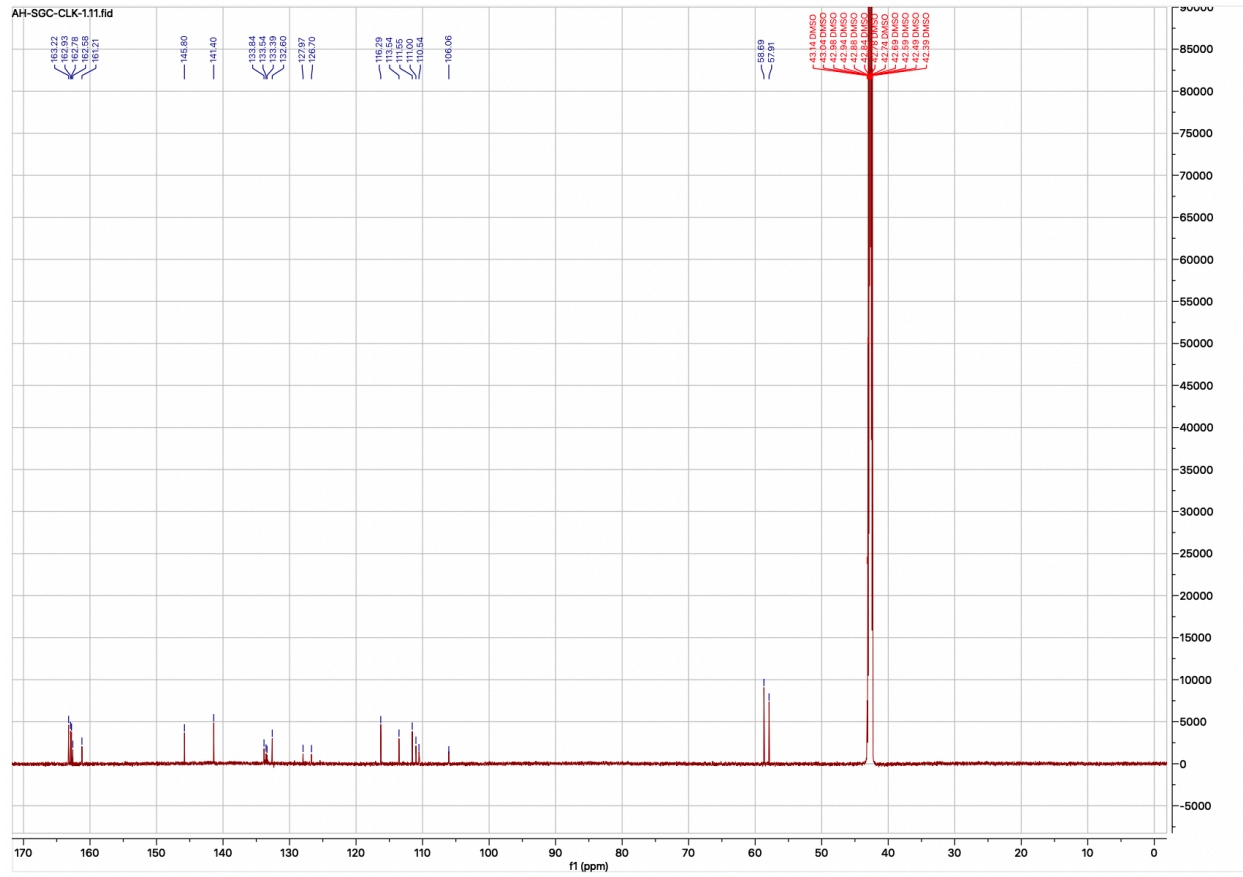

## Negative control

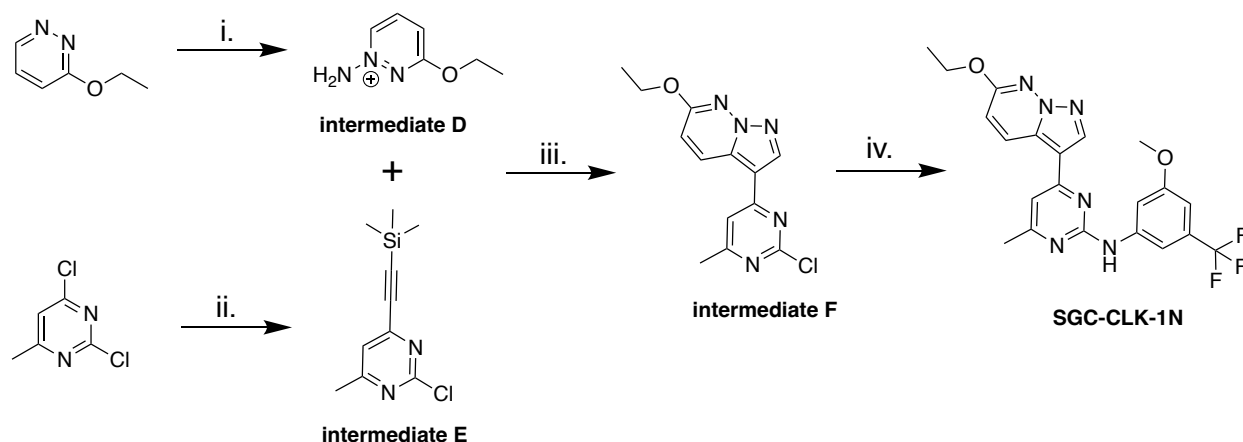

**Reagent and conditions:** i) Amino hydrogen sulphate,  $\text{KHCO}_3$ ,  $\text{H}_2\text{O}$ , 80 C, 14 h; ii)  $\text{KHCO}_3$ ,  $\text{KOH}$ ,  $\text{H}_2\text{O}$ ,  $\text{DCM}$ , r.t, 18 h; iii)  $\text{ETMS}$ ,  $\text{Pd}(\text{dppf})\text{Cl}_2 \cdot \text{CH}_2\text{Cl}_2$ ,  $\text{CuI}$ ,  $\text{PPh}_3$ ,  $\text{TEA}$ ,  $\text{THF}$ , 70 C, 15 min; iv)  $\text{TFA}$ ,  $\text{tert-BuOH}$ , 85 C, 15 h.

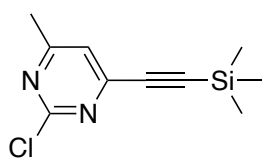

### 2-chloro-4-methyl-6-((trimethylsilyl)ethynyl)pyrimidine (Intermediate E):

2,4-dichloro-6-methylpyrimidine (1.0 g, 6.10 mmol, 1.00 eq.) and  $\text{THF}$  (30 mL) degassed with nitrogen for 10-12 min, then ethynyltrimethylsilane (0.66 g, 6.7 mmol, 1.1 eq.) and triethylamine (0.68 g, 6.7 mmol, 1.10 eq., 0.94 mL) added, degassed for another 5 min, then the rest of reagents  $\text{PdCl}_2(\text{dppf})\text{-CH}_2\text{Cl}_2$  adduct (0.25 g, 0.31 mmol, 0.05 eq.), copper(I) iodide (0.12 g, 0.61 mmol, 0.10 eq.), triphenylphosphine (0.16 g, 0.61 mmol, 0.10 eq.) were added. Reflux kept for 15 min. Bulky solid formed. Filtered over celite, rinsed with  $\text{EtOAc}$ . Concentrated in the rotavapor, tick brown liquid/paste found. The crude product was purified using flash chromatography (0 to 15%  $\text{EtOAc}$ ) 1.025 g (yield 67%), purity around 90%.

$^1\text{H}$  NMR (400 MHz,  $\text{DMSO-}d_6$ )  $\delta$  ppm 0.27 (bs, 9 H), 2.46 (s, 3 H), 7.61 (s, 1 H).

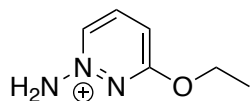

### 1-amino-3-ethoxypyridazin-1-ium (Intermediate D):

Amino hydrogen sulphate (0.82 g, 7.25 mmol, 4.5 eq.) was dissolved in water (1.6 mL),  $\text{KHCO}_3$  (0.72 g, 7.25 mmol, 4.5 eq.) in water (1.0 mL), pH 5. Then 3-ethoxypyridazine (0.20 g, 1.61 mmol, 1.00 eq.) was added in portion. Reaction was then stirred at 80 °C overnight. This crude is used as is for the next reaction without purification.

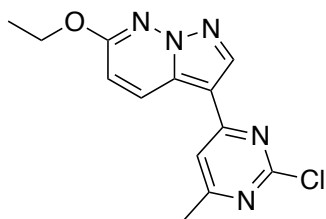

### 3-(2-chloro-6-methylpyrimidin-4-yl)-6-ethoxypyrazolo[1,5-b]pyridazine (Intermediate F):

3-ethoxy-1/4-pyridazin-1-amine (0.22 g, 1.6 mmol, 2.0 eq.) from the previous step (pH = 1) was treated with saturated  $\text{KHCO}_3$  to bring the pH to 7. 2-chloro-4-methyl-6-((trimethylsilyl)ethynyl)pyrimidine (0.18 g, 0.88 mmol, 1.00 eq.) was dissolved in 0.8 mL of DCM (1 M), added in one portion over the crude. KOH (0.27 g, 4.8 mmol, 6 eq.) was dissolved in  $\text{H}_2\text{O}$  (4.8 mL) 0.9-1.0 M and was added in one portion over previous mixture. The reaction mixture was transformed dark red in color after 5-10 min. Reaction mixture was strongly stirred at r.t. for 22 h. The crude mixture was then quenched with water, extracted with DCM, and combined organic layers dried over anhydrous  $\text{Na}_2\text{SO}_4$ . Crude was dry loaded on a 10 g Biotage Sfar 60  $\mu\text{m}$  silica cartridge (Hexanes/EtOAc 70:30) and whitish solid yielded (0.116 g, 48% yield). LCMS  $[\text{M}+1] = 290$ , purity > 95%.

$^1\text{H}$  NMR (400 MHz,  $\text{DMSO}-d_6$ )  $\delta$  ppm 1.41 (t,  $J=7.0$  Hz, 3 H), 2.49 (br s, 3 H), 4.41 (q,  $J=7.0$  Hz, 2 H), 7.23 (d,  $J=9.4$  Hz, 1 H), 7.92 (s, 1 H), 8.69 - 8.77 (m, 2 H).

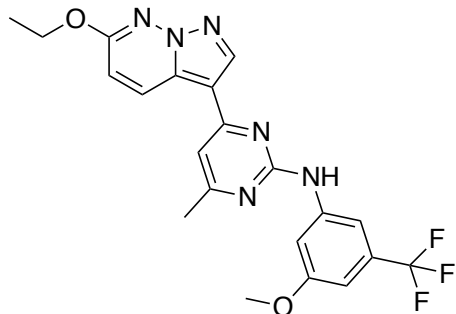

**4-(6-ethoxypyrazolo[1,5-*b*]pyridazin-3-yl)-*N*-(3-methoxy-5-(trifluoromethyl)phenyl)-6-methylpyrimidin-2-amine (SGC-CLK-1N, CAF-225):**

3-(2-chloro-6-methylpyrimidin-4-yl)-6-ethoxypyrazolo[1,5-*b*]pyridazine (0.065 g, 0.22 mmol, 1 eq.), 3-methoxy-5-(trifluoromethyl)aniline (0.051 g, 0.27 mmol, 1.20 eq.), and tert-butanol (4.5 mL) were mixed into a microwave vial, 4 small drops of TFA added, vial sealed, reaction stirred at 85 C for 15 h. Reaction mixture cooled to r.t., quenched with water and NaHCO<sub>3</sub>, pH adjusted to 7, solid precipitated, more water added, solid filtrated, thoroughly rinsed with water, air dried. Pale pink solid obtained, 110 mg recovered. The product was purified using Biotage Sfar 10g silica cartridge, solid load. Hexanes/EtOAc gradient from 0% to 50% EtOAc and pale whitish solid yielded (0.065 g, yield 30%, > 95% pure). LCMS [M+1] = 445, 446.

<sup>1</sup>H NMR (850 MHz, DMSO-*d*<sub>6</sub>) δ 9.85 (s, 1H), 8.98 (d, *J* = 9.3 Hz, 1H), 8.65 (s, 1H), 7.84 (d, *J* = 1.8 Hz, 1H), 7.75 (s, 1H), 7.35 (s, 1H), 7.09 (d, *J* = 9.5 Hz, 1H), 6.83 (t, *J* = 2.0 Hz, 1H), 4.42 (q, *J* = 7.0 Hz, 2H), 3.84 (s, 3H), 2.44 (s, 3H), 1.43 (t, *J* = 7.0 Hz, 3H).

<sup>13</sup>C NMR (214 MHz, DMSO-*d*<sub>6</sub>) δ 170.71, 163.20, 162.67, 162.40, 162.26, 145.99, 141.02, 133.78, 133.48, 133.33, 132.48, 127.99, 126.71, 116.20, 113.69, 110.82, 110.65, 110.48, 105.90, 66.43, 58.62, 27.01, 17.24.



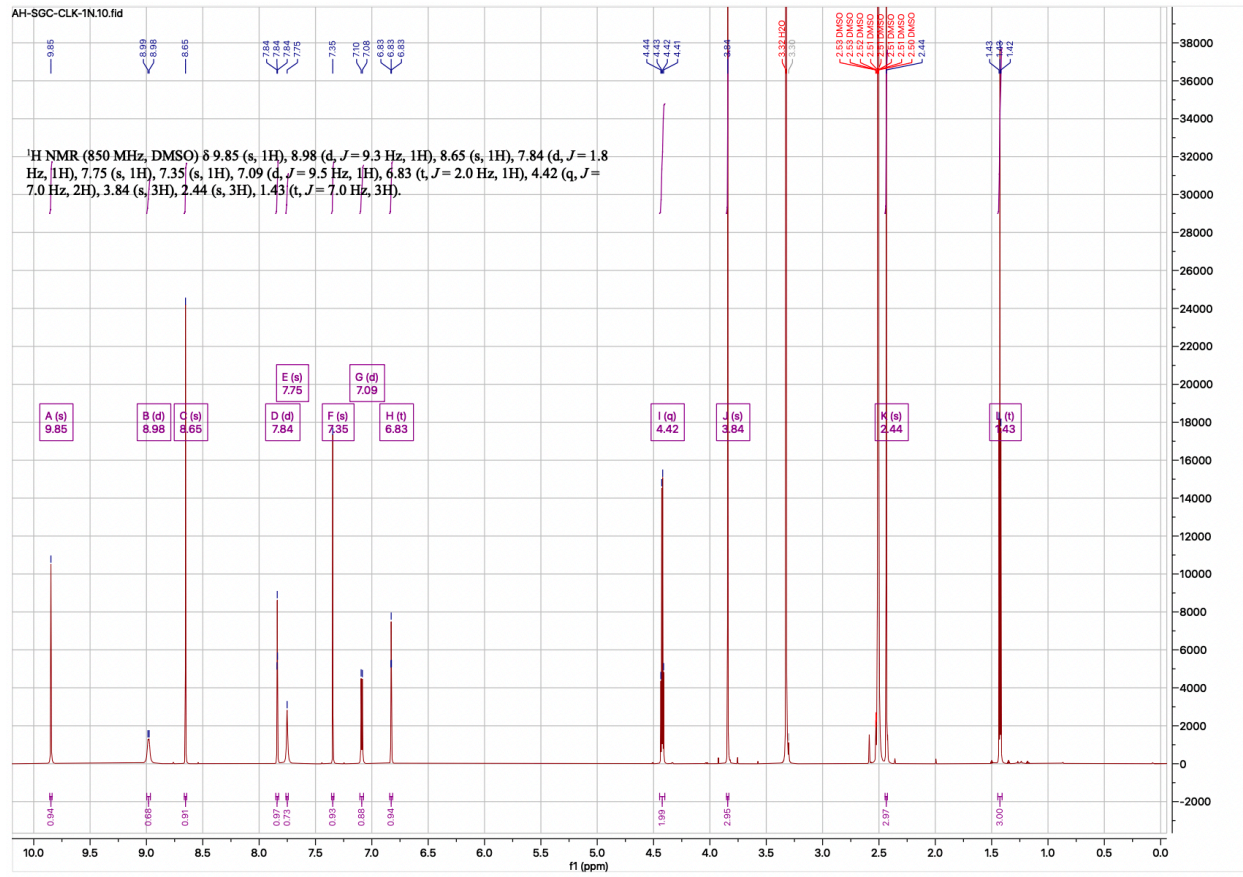

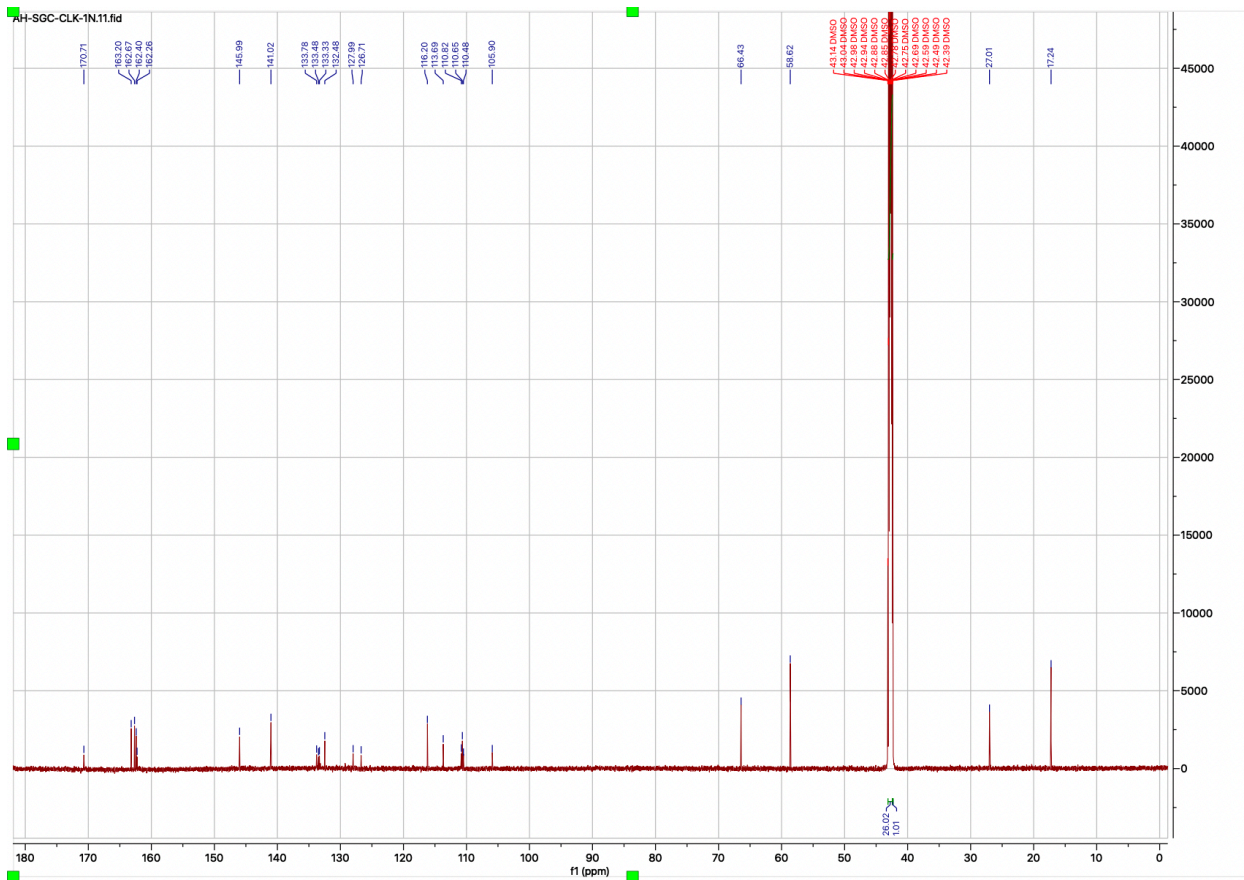

Original scans for CLK2 blot

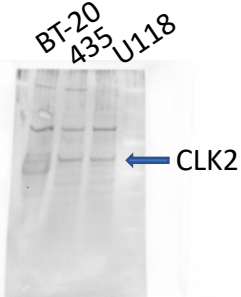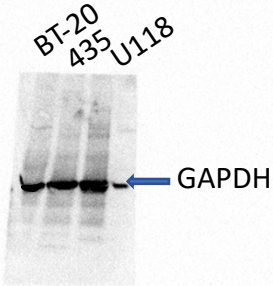

Supplement: NIHMS1942723-supplement-Supplementary_data_1.pdf [file NIHMS1942723-supplement-Supplementary_data_1.pdf]
